# Supplementary material for: REDD1/DDIT4 counteracts endoplasmic reticulum stress-induced apoptosis by controlling the expression of death receptor TRAILR2/DR5 in cancer cells
Source: Research Square preprint supplement (doi:10.21203/rs.3.rs-6111887/v1), 2025-04-16
Supplement: Supplementary file 1 [file cb19d3d8ccce4874eee22447.docx]

**Supplementary figure legends**

**Figure S1. Validation of increasing induction of apoptosis upon ER stress in REDD1 knockdown cells.** **(A)** HCT116 cells were transfected with scrambled oligonucleotide (Sc) or REDD1 siRNAs (siREDD1#1 or siREDD1#3) for 48 h prior to TG (100 nM) treatment for a further 24 h. Apoptosis was determined after treatment by subG1 analysis (*p ≤ 0.05; ***p ≤ 0.001. Two-way ANOVA. Tukey’s multiple comparisons test). REDD1 knockdown and 4EBP1 phosphorylation, were assessed by western blotting. α-tubulin was used as protein-loading control. **(B)** HCT116 cells were transfected with scrambled oligonucleotide (Sc) or REDD1 siRNAs (siREDD1#2 [left panel] or siREDD1#3 [right panel]) for 48 h prior to TN (1 μg/mL) treatment for a further 30 h. Apoptosis was determined after treatment by subG1 analysis (**p ≤ 0.01; ***p ≤ 0.001. Multiple unpaired t test). REDD1 knockdown and phosphorylation of 4EBP1 and p70S6K were assessed in whole-cell extracts by western blotting. GAPDH was used as protein-loading control.

**Figure S2. Analysis of the role of the IRE1α branch of the UPR on the increased susceptibility of REDD1/DDIT4 KO cells to ER stress-induced TRAILR2/DR5 up-regulation. (A)** HCT116 ø#2 and REDD1 KO A1#5 clones were treated with or without TG (100 nM) for the indicated times. XBP1 splicing and β-actin levels were examined by RT-PCR (C- = negative control). **(B)** HCT116 ø#2 and REDD1 KO A1#5 clones were transfected with scrambled oligonucleotide#2 (Sc) or IRE1α siRNA (siIRE1α) for 48 h prior to TG (100 nM) treatment for a further 7 h. REDD1 deletion and IRE1α knockdown were determined in whole cell extracts by western blotting (left panel). Hsp70 was used as protein-loading control. IRE1α knockdown efficiency was also assessed through analysis of XBP1 splicing by RT-PCR (left panel). *TRAILR2/DR5* expression was examined by RT-qPCR (right panel). *TRAILR2/DR5* RNA relative levels were referred to ø#2 clone without treatment. n = 2. **(C)** HCT116 ø#2, *REDD1* KO A1#5 and E2#1 cells were treated with or without the JNK inhibitor SP600125 (25 M) for 2 h and then TG (100 nM) was added or not for a further 16 h-period. Phosphorylation of c-Jun and REDD1 levels were determined in whole-cell extracts by western blotting. α-tubulin was used as protein-loading control (left panel). TRAILR2/DR5 expression was assessed by RT-qPCR and RNA relative levels of *TRAILR2/DR5* were referred to ø#2 clone without treatment. **(D)** Control and *REDD1* KO clones were treated with TG for 7 h. *MECOM* mRNA relative levels in control and *REDD1* KO clones were examined by RT-qPCR. *MECOM* mRNA relative levels were referred to ø#2 clone without treatment. n = 2.
